# Supplementary material
Source: publisher site journal article supplement (https://www.dovepress.com/article/305168)
Supplement: Supplementary file 1 [file get_supplementary_file.php]

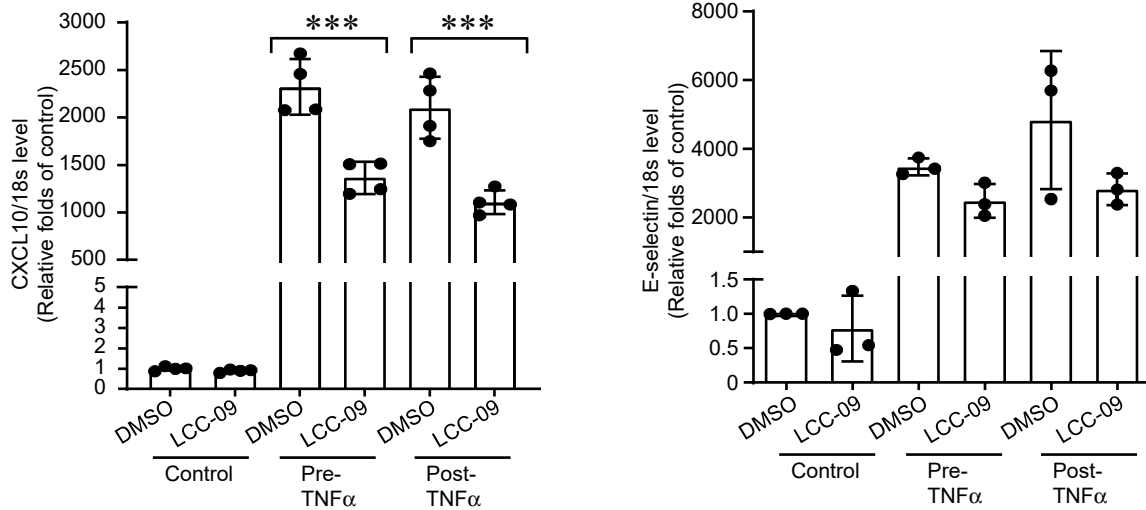

**Supplemental Fig.1. Related with Fig.1. Post-treatment of LCC-09 reduced TNF $\alpha$ -induced expression of CXCL10 and E-selectin.** In the pre-TNF $\alpha$  group, HUVECs were pre-treated with DMSO or LCC-09 (5  $\mu$ M) for 30 minutes and then exposed to TNF $\alpha$  for 6 h. In the post-TNF $\alpha$  group, DMSO or LCC-09 was added to the cultured medium 30 mins after TNF $\alpha$  stimulation and RNA was collected 6 h after TNF $\alpha$  stimulation. In the control group, HUVECs were co-cultured with DMSO or LCC-09 (5  $\mu$ M) for 6 h and 30 mins. qPCR was performed and data are expressed as relative folds of control group, which was normalized to 1. \*\*\*,  $p < 0.001$ .

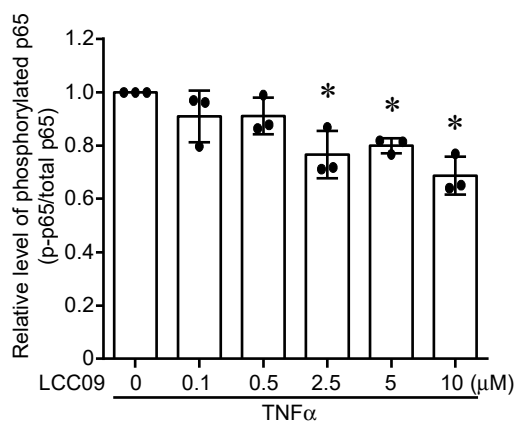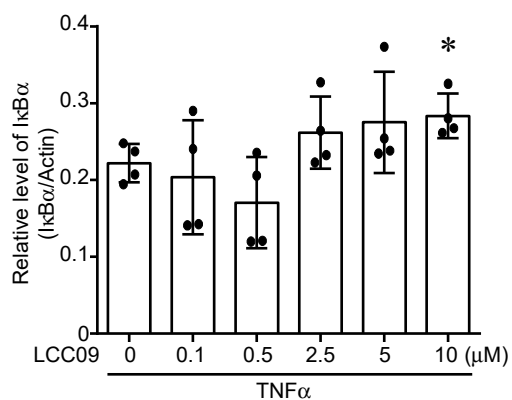

**Supplemental Fig.2. Related with Fig.2.** Protein quantification of phosphorylated NFκB p65 and IκBα in Fig.2A. \*, p<0.05, compared with control.

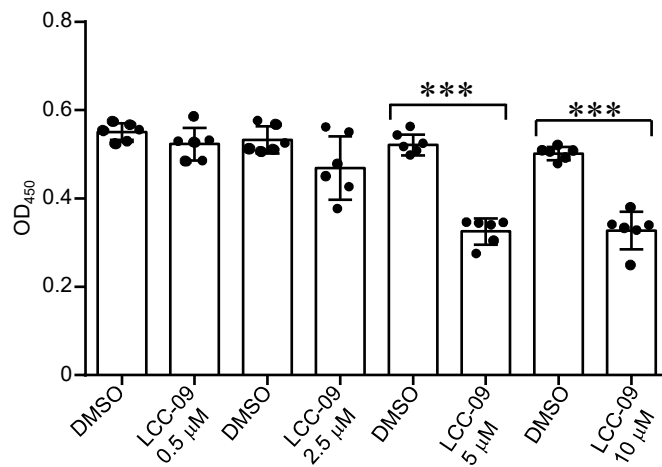

**Supplemental Fig.3. MTS assay of endothelial cells.**

HUVECs were administrated with DMSO or LCC-09 for 24 h at the indicated concentrations. The MTS assay was measured by absorbance at 450 nm. The results are representative of 3 independent experiments. \*\*\*,  $p < 0.05$ .
